# Supplementary material for: Metallic W/WO2 solid-acid catalyst boosts hydrogen evolution reaction in alkaline electrolyte
Source: PubMed Central journal article supplement (PMC10475068; doi:10.1038/s41467-023-41097-w), 2023-09-02
Supplement: 41467_2023_41097_MOESM1_ESM.pdf [file 41467_2023_41097_MOESM1_ESM.pdf]

## Supplementary Information

# **Metallic W/WO<sub>2</sub> solid-acid catalyst boosts hydrogen evolution reaction in alkaline electrolyte**

Zhigang Chen<sup>1,2†</sup>, Wenbin Gong<sup>3,4†</sup>, Juan Wang<sup>5†</sup>, Shuang Hou<sup>1</sup>, Guang Yang<sup>1</sup>,  
Chengfeng Zhu<sup>1</sup>, Xiyue Fan<sup>1</sup>, Yifan Li<sup>1</sup>, Rui Gao<sup>6</sup>, Yi Cui<sup>1\*</sup>

<sup>1</sup>i-lab, Vacuum Interconnected Nanotech Workstation (Nano-X), Suzhou Institute of  
Nano-Tech and Nano-Bionics, Chinese Academy of Sciences, Suzhou 215123, China.

<sup>2</sup>School of Materials Science and Engineering, Chongqing University of Technology,  
Chongqing 400054, China.

<sup>3</sup>School of Physics and Energy, Xuzhou, University of Technology, Xuzhou 221018,  
China.

<sup>4</sup>Division of Nanomaterials and Jiangxi Key Lab of Carbonene Materials, Jiangxi  
Institute of Nanotechnology, Nanchang 330200, China.

<sup>5</sup>Shanghai Synchrotron Radiation Facility (SSRF), Shanghai Advanced Research  
Institute, Chinese Academy of Sciences, 201204, China.

<sup>6</sup>Department of Chemical Engineering, Waterloo Institute for Nanotechnology,  
Waterloo Institute for Sustainable Energy, University of Waterloo, Waterloo, Ontario  
N2L 3G1, Canada.

†These authors contributed equally to this work.

\*Corresponding authors: Yi Cui, email: [ycui2015@sinano.ac.cn](mailto:ycui2015@sinano.ac.cn)

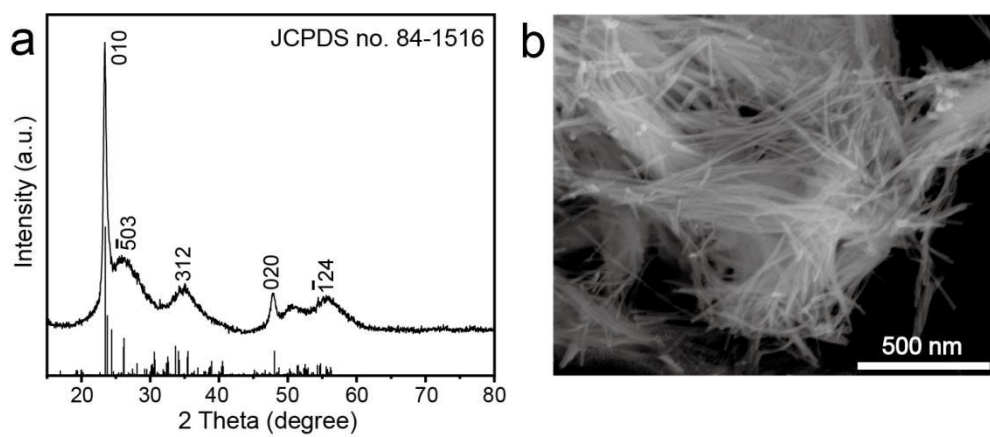

**Supplementary Figure 1.** Structural and morphological characterizations of W<sub>18</sub>O<sub>49</sub> nanowires. (a) XRD pattern and (b) Typical scanning electron microscopy (SEM) image of W<sub>18</sub>O<sub>49</sub> nanowires.

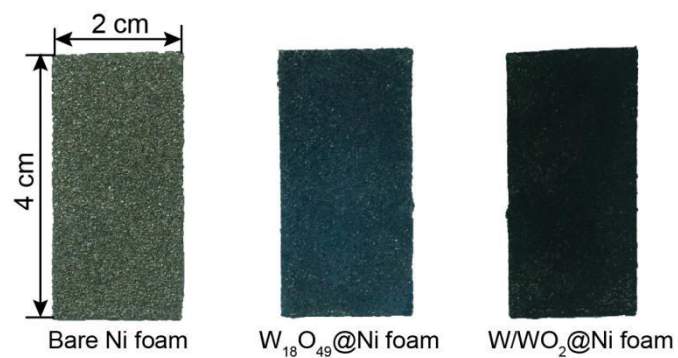

**Supplementary Figure 2.** Optical images of the as-prepared electrodes. Optical observations of the electrodes during the different stage of preparation procedures, with the dimensions (2 cm x 4 cm) labeled, where the homogeneous colors suggests the uniformity of supported active materials on Ni foam.

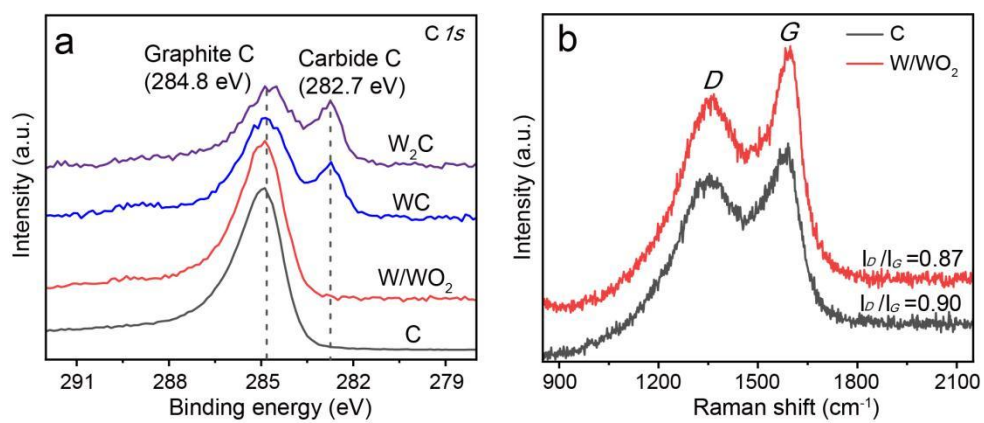

**Supplementary Figure 3.** The identification of surface carbon species in the as-prepared W/ $WO_2$  materials. (a)  $C 1s$  XPS and (b) Raman spectra.

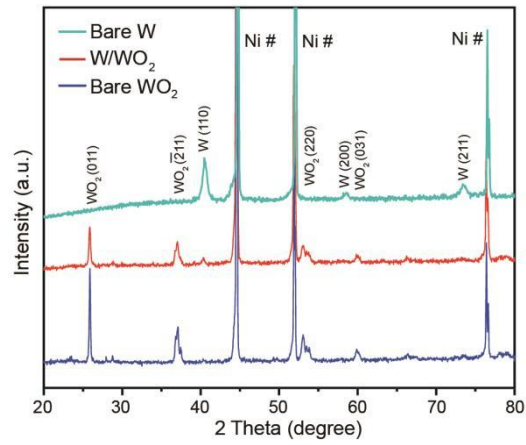

**Supplementary Figure 4.** Structural characterizations of different tungsten-based materials. XRD patterns of W, WO<sub>2</sub>, and W/WO<sub>2</sub>.

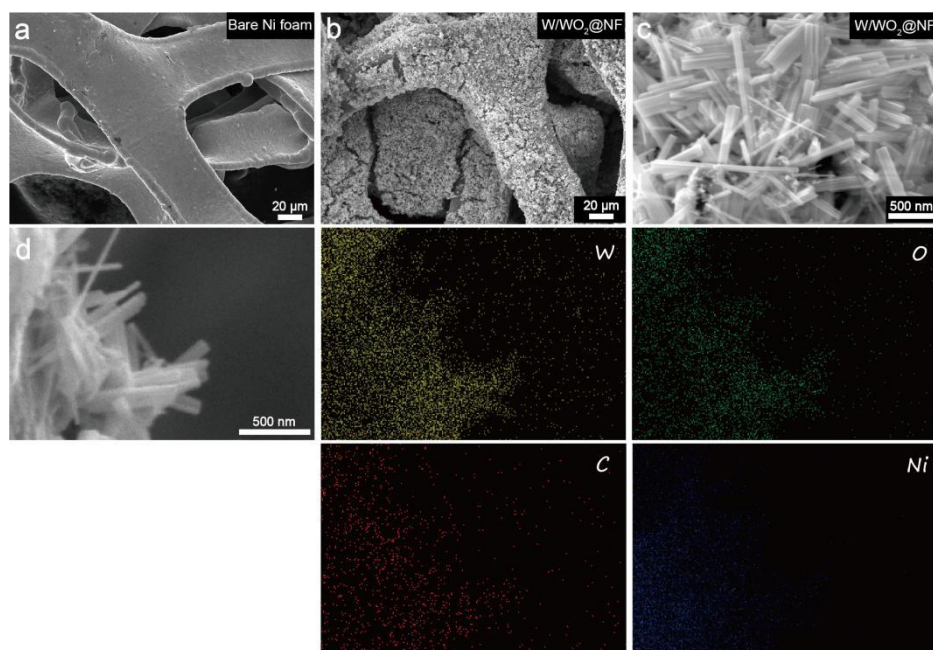

**Supplementary Figure 5.** Morphological characterizations of W/WO<sub>2</sub>@Ni foam. (a) SEM image of bare Ni foam. (b) Low- and (c) high-magnification SEM images of W/WO<sub>2</sub> materials on Ni foam. (d) Typical nano-rod structure of W/WO<sub>2</sub> materials and corresponding EDS-Mapping images of W, C, O, and Ni elements.

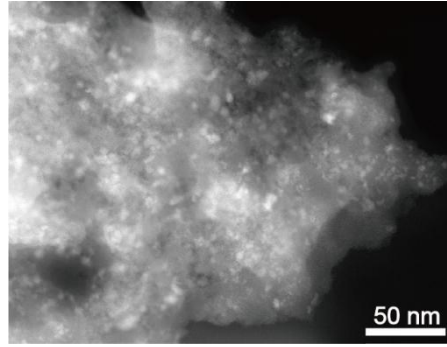

**Supplementary Figure 6.** Morphological characterization of W nanoparticles embedded on carbon matrix. Low-magnification scanning transmission electron microscopy (STEM) image of W nanoparticles.

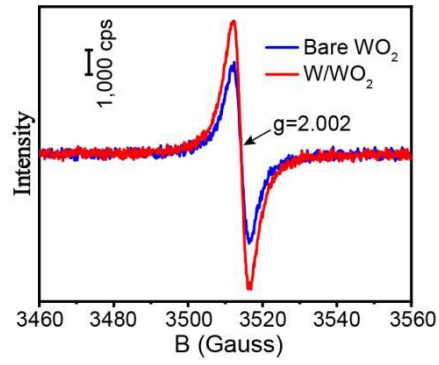

**Supplementary Figure 7.** Detection of rich oxygen vacancies in W/WO<sub>2</sub> materials. Electron spin resonance (ESR) spectroscopy of phase-pure WO<sub>2</sub> and W/WO<sub>2</sub> metallic heterostructure.



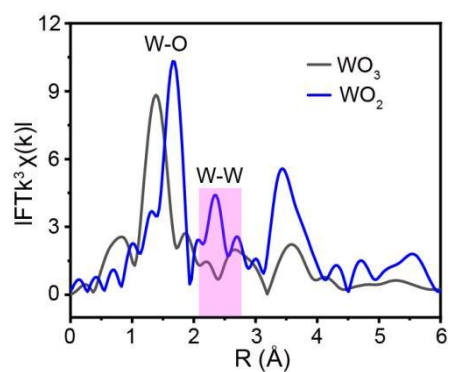

**Supplementary Figure 8.** Comparison of the metallic feature between  $\text{WO}_3$  and  $\text{WO}_2$  materials. Fourier-transformed extended X-ray absorption fine structure (FT-EXAFS) spectra (R-space) of  $\text{WO}_3$  and  $\text{WO}_2$  samples, where the W-W coordination at approximately 2.4  $\text{\AA}$  (pink area) can be observed on  $\text{WO}_2$  sample, but it is almost absent on stoichiometry  $\text{WO}_3$  reference, demonstrating the metallic property of  $\text{WO}_2$  phase.

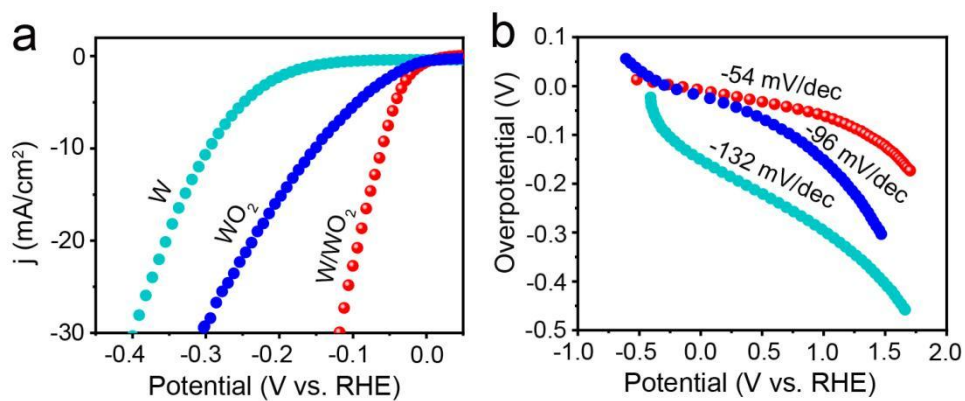

**Supplementary Figure 9.** The evaluation of HER performance of W, WO<sub>2</sub>, and W/WO<sub>2</sub> catalysts in 1 M KOH electrolyte using the rotating disk electrode technique at 1600 rpm. (a) Polarization curve. (b) Tafel plots.

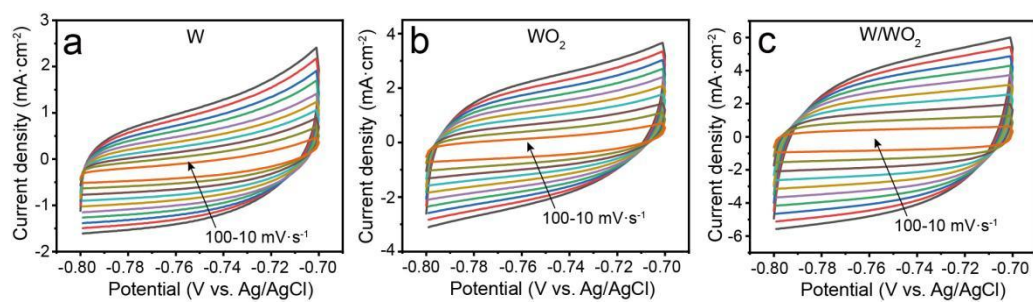

**Supplementary Figure 10.** Cyclic voltammetry (CV) measurements at different scan rates. (a) W, (b) WO<sub>2</sub>, and (c) W-SAs in the voltage window from -0.8 to -0.7 V vs. Ag/AgCl at different scan rates (10-100 mV/s) in 1.0 M KOH electrolyte.

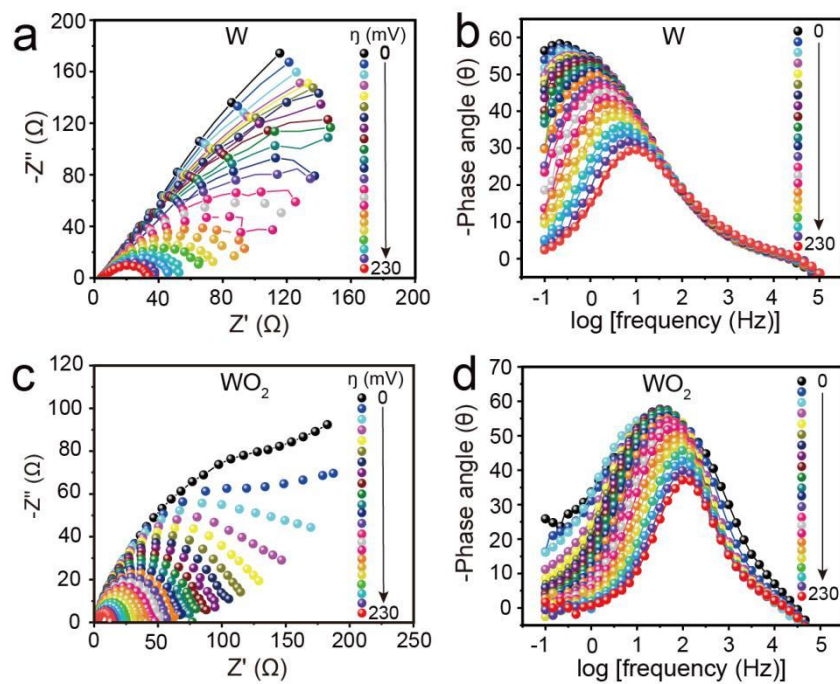

**Supplementary Figure 11.** Electrochemical impedance spectra (EIS) measurements of W and WO<sub>2</sub> catalysts. Nyquist plots of (a) W and (c) WO<sub>2</sub>. Bode phase plots of (b) W and (d) WO<sub>2</sub>.

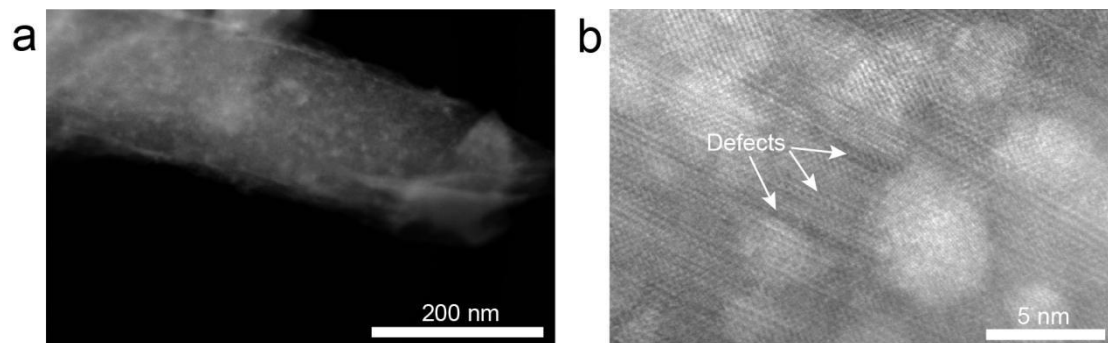

**Supplementary Figure 12.** Morphological characterization of used W/WO<sub>2</sub> catalyst. (a) Low- and (b) high-magnification STEM images of used W/WO<sub>2</sub> catalyst. From the low-magnification STEM image, one can see that high density of nanoparticles are still retained on the used W/WO<sub>2</sub> surface, while the high-magnification STEM image reveal the appearance of defects, indicating the proton-coupled electron reaction of HER process has caused a slight reduction of WO<sub>2</sub> matrix.

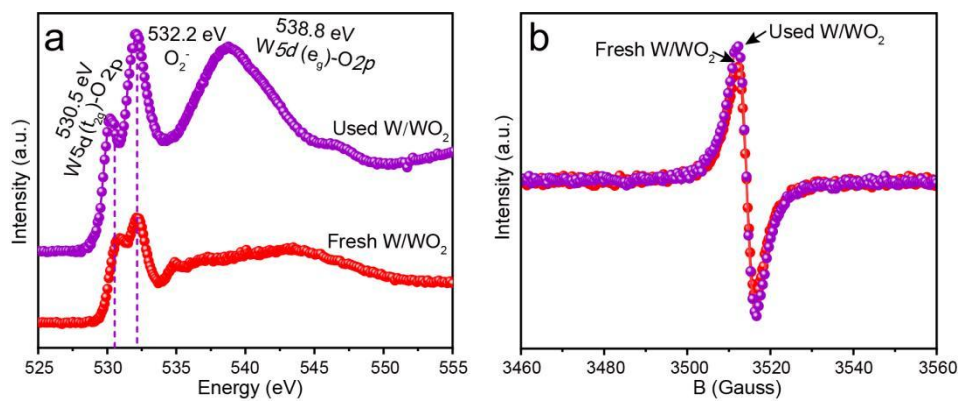

**Supplementary Figure 13.** Oxygen vacancy characterization of fresh and used W/WO<sub>2</sub> catalysts. (a) O K-edge near edge X-ray absorption fine structure (NEXAFS) spectroscopy. (b) ESR spectroscopy.

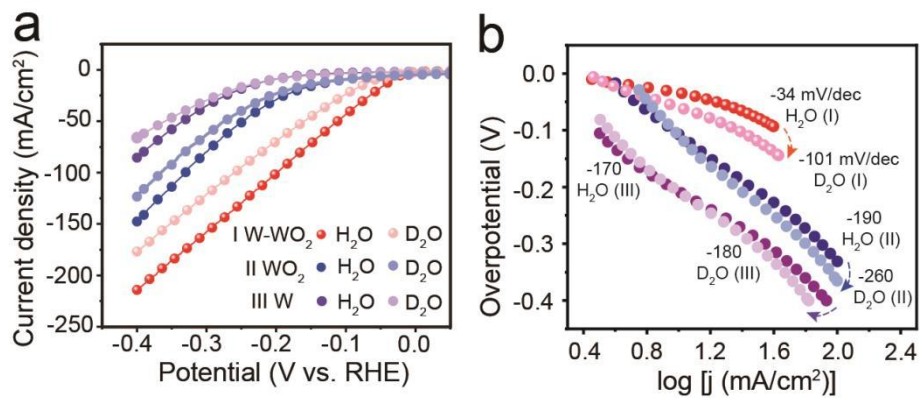

**Supplementary Figure 14.** Evaluation of HER activities for W, WO<sub>2</sub>, and W/WO<sub>2</sub> catalysts under 1.0 M KOH/H<sub>2</sub>O and KOD/D<sub>2</sub>O solutions, respectively. (a) LSV curves and (b) Tafel plots of W, WO<sub>2</sub>, W/WO<sub>2</sub> catalysts.

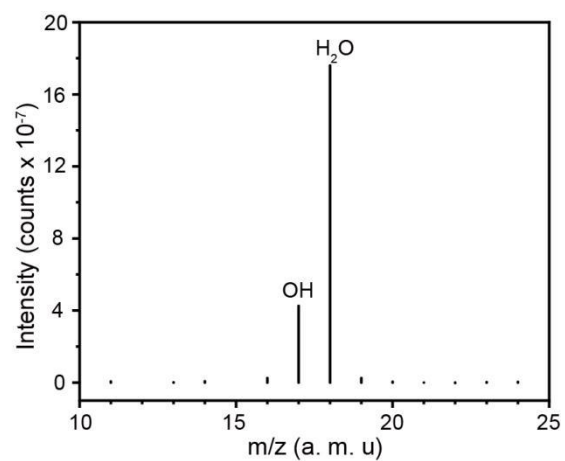

**Supplementary Figure 15.** Environment identification of XPS analysis chamber.

H<sub>2</sub>O mass spectra of XPS analysis chamber after introducing 0.1 mbar H<sub>2</sub>O.



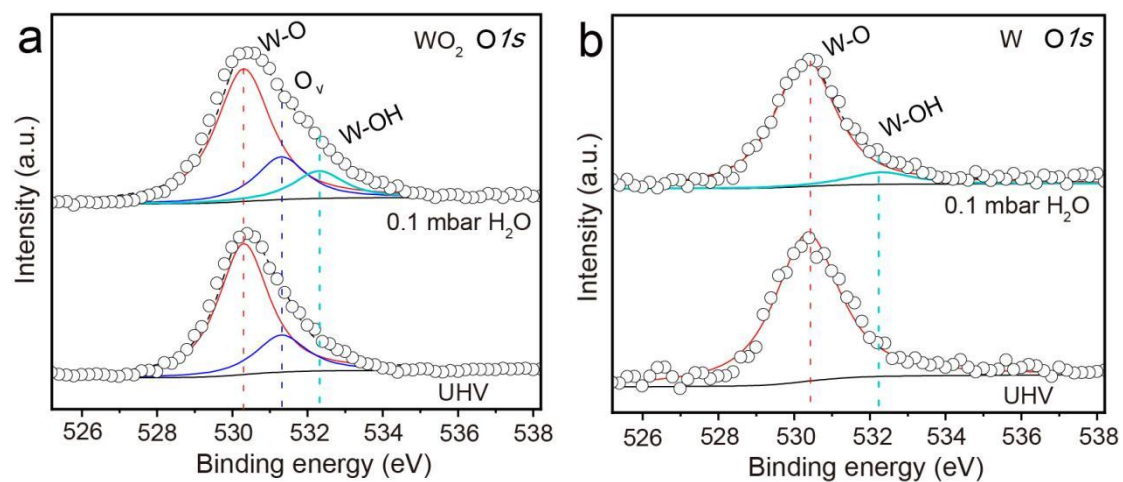

**Supplementary Figure 16.** In situ NAP-XPS measurements. O *1s* core-level XPS spectra of (a) WO<sub>2</sub> and (b) W recorded under ultrahigh vacuum and 0.1 mbar H<sub>2</sub>O conditions.

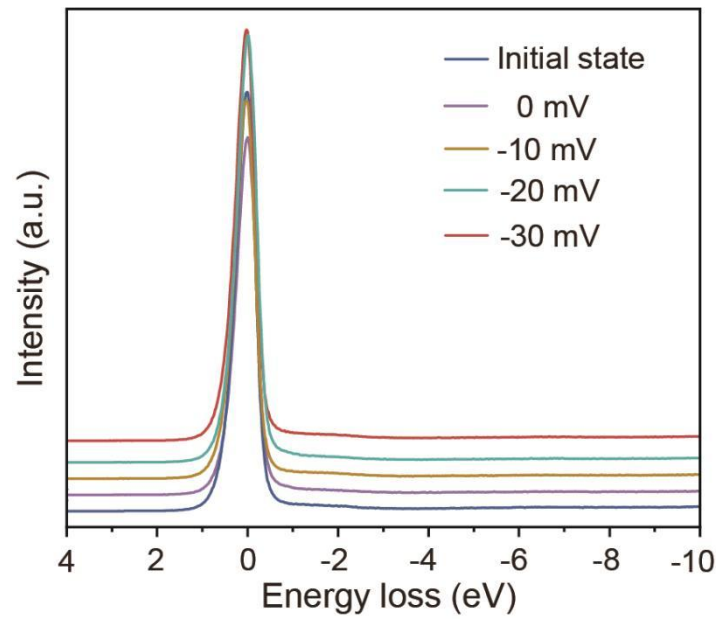

**Supplementary Figure 17.** Detection of H signal of bare C after treatments by increased overpotentials. The reflection electron energy loss spectroscopy (REELS) of bare C after treatments by the applied increased overpotentials, with bare C sample only soaked in KOH solutions as the initial state.

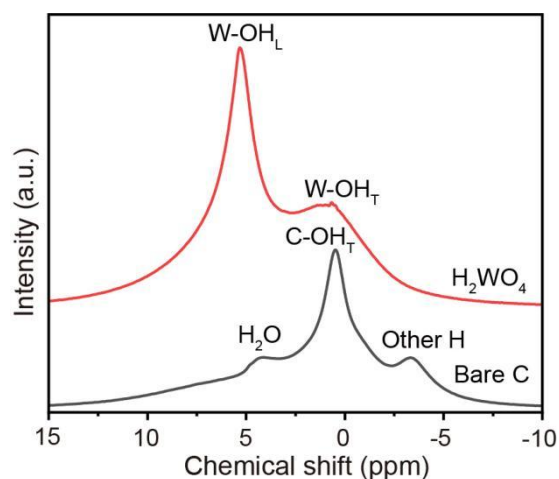

**Supplementary Figure 18.** Identification of chemical states of hydrogen species in bare C and commercial  $\text{H}_2\text{WO}_4$  references. Solid-state  $^1\text{H}$  magic-angle-spinning nuclear magnetic resonance ( $^1\text{H}$  MAS NMR) spectra of bare C and commercial  $\text{H}_2\text{WO}_4$  materials. For commercial  $\text{H}_2\text{WO}_4$  sample, two continuous hydrogen peaks can be observed at chemical shifts of 5.3 and 0.8 ppm, where hydrogen signal at 5.3 ppm can be attributed to lattice hydrogen ( $\text{W-OH}_\text{L}$ ), while another one at 0.8 ppm may originate from the terminated hydrogen species ( $\text{W-OH}_\text{T}$ ). For bare C sample, one predominant peak with two shoulder bands are visible at 4.3, 0.4, and -3.3 ppm, where the predominant peak (0.4 ppm) can be assigned to terminated hydrogen species ( $\text{C-OH}_\text{L}$ ), while adsorbed  $\text{H}_2\text{O}$  molecules and other hydrogen species should be responsible for peaks at 4.3 and -3.3 ppm, respectively.

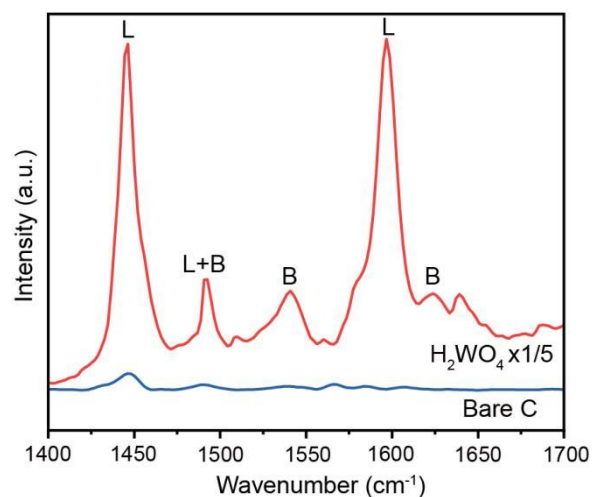

**Supplementary Figure 19.** Identification of chemical states of hydrogen species in bare C and commercial H<sub>2</sub>WO<sub>4</sub> references. Pyridine infrared (Py-IR) spectra of bare C and commercial H<sub>2</sub>WO<sub>4</sub> materials. In contrast to commercial H<sub>2</sub>WO<sub>4</sub> reference, bare C exhibits weak feature of solid-acid catalyst with negligible signals of Lewis and Brønsted acid sites in the wavenumber range of 1400~1700 cm<sup>-1</sup>.

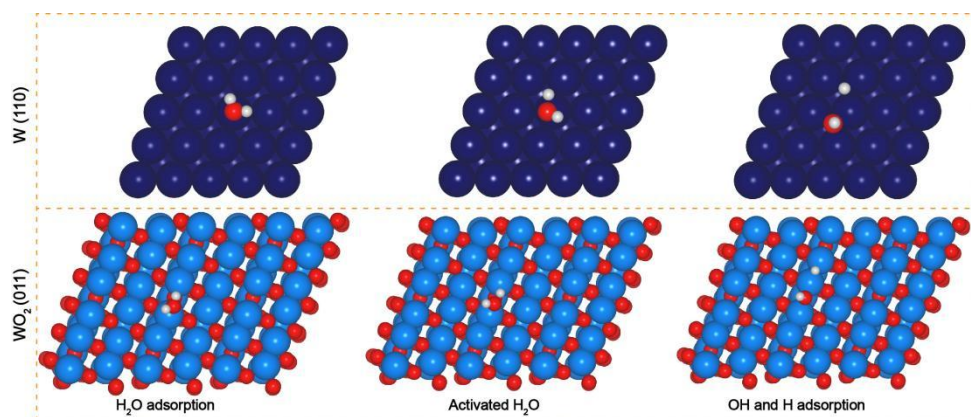

**Supplementary Figure 20.** Schematic pathway of alkaline HER process on W (110) and WO<sub>2</sub> (01-1) facets. H<sub>2</sub>O molecule undergoes water adsorption, activated H<sub>2</sub>O adsorption, produced OH and H adsorption in alkaline HER process. The figure is created using VESTA software (Ref: *J. Appl. Crystallogr.*, **44**, 1272-1276 (2011)).

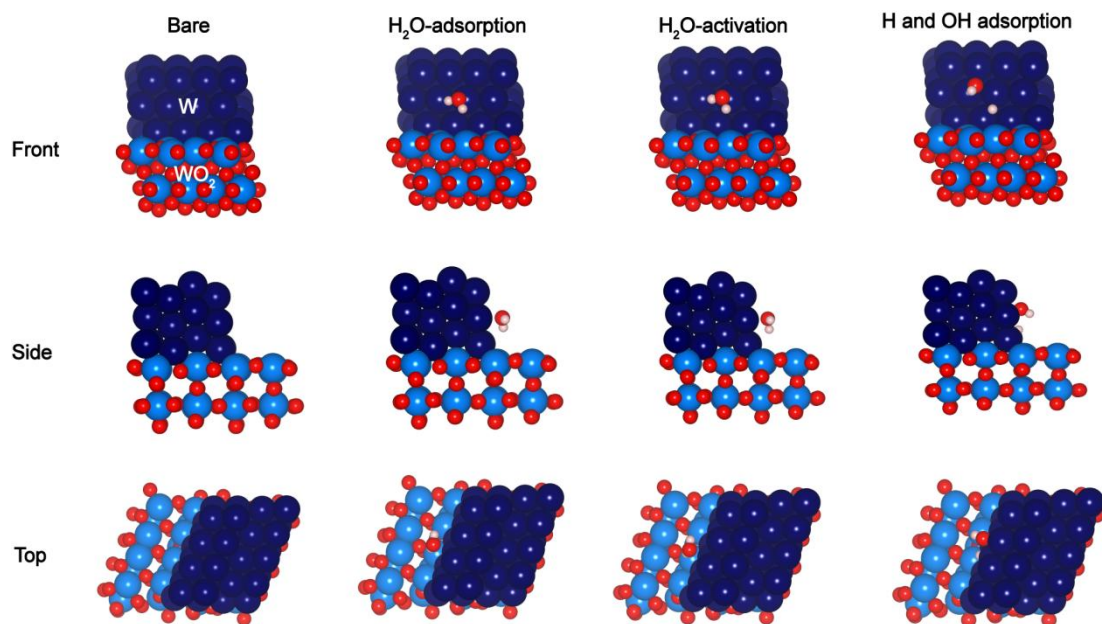

**Supplementary Figure 21.** Front, side and top images of the calculated structure for W/WO<sub>2</sub> interface. H<sub>2</sub>O molecule undergoes water adsorption, activated H<sub>2</sub>O adsorption, produced H and OH adsorption on W/WO<sub>2</sub> interface in alkaline HER process. The figure is created using VESTA software (Ref: *J. Appl. Crystallogr.*, **44**, 1272-1276 (2011)).

**Supplementary Table 1.** Comparison of overpotentials (10 mA/cm<sup>2</sup>) and Tafel slopes of W/WO<sub>2</sub> catalyst and previously reported excellent transition-metal-oxide based HER catalysts in alkaline solutions.

| Materials                                                                | Morphology                   | Overpotential<br>( $\eta_{10}$ , mA/cm <sup>2</sup> ) | Tafel slope<br>(mV·dec <sup>-1</sup> ) | Reference                                                |
|--------------------------------------------------------------------------|------------------------------|-------------------------------------------------------|----------------------------------------|----------------------------------------------------------|
| mMoO <sub>3</sub>                                                        | Nanoparticle<br>(50-100 nm)  | -138                                                  | -56                                    | <i>Adv. Energy Mater.</i> <b>2016</b> , 6, 1600528       |
| Ov- $\alpha$ -MoO <sub>3</sub>                                           | Nanoparticle<br>(~40 nm)     | -138                                                  | -60                                    | <i>J. Mater. Chem. A</i> , <b>2019</b> , 7, 257-268      |
| GDY/MoO <sub>3</sub>                                                     | Nanoparticle<br>(~3.45 nm)   | -170                                                  | -70                                    | <i>J. Am. Chem. Soc.</i> <b>2021</b> , 143, 8720-8730    |
| Co-WO <sub>2.7-x</sub>                                                   | Nanorod                      | -59                                                   | -86                                    | <i>Chem. Eng. J.</i> <b>2023</b> , 451, 138939           |
| La <sub>0.5</sub> Sr <sub>0.5</sub> CoO <sub>3-<math>\delta</math></sub> | Nanoparticle                 | ~230                                                  | -34                                    | <i>Nat. Commun.</i> <b>2019</b> , 10, 1723               |
| Ni/NiO-3.8                                                               | Nanoparticle<br>(~3.8 nm)    | -90                                                   | -41                                    | <i>Natl Sci Rev</i> , <b>2020</b> , 7, 27-36             |
| Ni-MoO <sub>2</sub> /NF                                                  | Nanoparticle<br>(200-300 nm) | -49                                                   | -75.1                                  | <i>Appl. Catal. B Environ.</i> <b>2022</b> , 301, 120818 |
| Co <sub>2</sub> Mo <sub>3</sub> O <sub>8</sub>                           | Nanoparticle<br>(5-10 nm)    | -37                                                   | -58                                    | <i>Nano Energy</i> <b>2021</b> , 87, 106217              |
| MoS <sub>2</sub> /Ni <sub>2</sub> O <sub>3</sub> H                       | Heterostructure              | -84                                                   | -82.3                                  | <i>Small</i> <b>2020</b> , 16, 2002212                   |
| NiO/Ni                                                                   | Nanoparticle<br>(~ 3 nm)     | -121                                                  | -88                                    | <i>Nano Energy</i> <b>2017</b> , 35, 207-214             |
| CoOx@CN                                                                  | Nanoparticle<br>(~ 3 nm)     | -232                                                  | -115                                   | <i>J. Am. Chem. Soc.</i> <b>2015</b> , 137, 2688-2694    |
| Ni(OH) <sub>2</sub> /MoS <sub>2</sub>                                    | Heterostructure              | -80                                                   | -60                                    | <i>Nano Energy</i> <b>2017</b> , 37, 74-80               |
| Co@NCNT/CoMo <sub>y</sub> O <sub>x</sub>                                 | Heterostructure              | -94                                                   | -76                                    | <i>J. Mater. Chem. A</i> , <b>2022</b> , 10, 3953-3962   |
| CuCo/CuCoO <sub>x</sub>                                                  | Heterostructure              | -115                                                  | -55                                    | <i>Adv. Funct. Mater.</i> <b>2018</b> , 28, 1704447      |

**Supplementary Table 2.** The fitted parameters of EIS data from W/WO<sub>2</sub> catalyst treated by increasing applied overpotentials. Note that inhomogeneities in the surface of metal oxide electrodes usually result in non-ideal capacitance in the double-layer at the solid/electrolyte interface. Thus, CPEs (CPE-T and CPE-P) are routinely used in place of pure capacitors to model this interfacial layer.

| Catalyst          | $\eta$ (mV) | $R_1$ ( $\Omega$ ) | $R_2$ ( $\Omega$ ) | $R_3$ ( $\Omega$ ) | $C_\phi$ (F) | CPE-T (F) | CPE-P (F) |
|-------------------|-------------|--------------------|--------------------|--------------------|--------------|-----------|-----------|
|                   | 0           | 4.2                | 7.8                | 786.4              | 0.014        | 0.020     | 0.58      |
|                   | -10         | 4.0                | 7.8                | 30.7               | 0.014        | 0.037     | 0.44      |
|                   | -20         | 4.0                | 4.4                | 4.8                | 0.015        | 0.018     | 0.50      |
| W/WO <sub>2</sub> | -30         | 4.2                | 4.4                | 2.6                | 0.016        | 0.015     | 0.51      |
|                   | -40         | 4.3                | 4.4                | 1.8                | 0.017        | 0.017     | 0.49      |
|                   | -50         | 4.2                | 4.4                | 1.6                | 0.018        | 0.017     | 0.46      |
|                   | -60         | 4.3                | 4.4                | 1.3                | 0.020        | 0.020     | 0.43      |



**Supplementary Table 3.** The relative concentrations of W-O, oxygen vacancies (Ov), W-OH, and adsorbed H<sub>2</sub>O in W/WO<sub>2</sub>, WO<sub>2</sub>, W materials under ultrahigh vacuum and 0.1 mbar H<sub>2</sub>O conditions in accordance with the deconvolution of O 1s XPS spectra.

| Materials         | Environment               | W-O (at%) | Ov (at%) | W-OH (at%) | H <sub>2</sub> O (at%) |
|-------------------|---------------------------|-----------|----------|------------|------------------------|
| W/WO <sub>2</sub> | UHV                       | 69.5      | 30.5     | 0          | 0                      |
|                   | 0.1 mbar H <sub>2</sub> O | 61.5      | 0        | 18.4       | 20.1                   |
| WO <sub>2</sub>   | UHV                       | 74.9      | 25.1     | 0          | 0                      |
|                   | 0.1 mbar H <sub>2</sub> O | 67.7      | 15.8     | 16.5       | 0                      |
| W                 | UHV                       | 100       | 0        | 0          | 0                      |
|                   | 0.1 mbar H <sub>2</sub> O | 91.2      | 0        | 8.8        | 0                      |

**Supplementary Table 4.** The concentrations of Brønsted acid sites ( $C_B$ ,  $\text{mmol}\cdot\text{g}^{-1}$ ) for used  $\text{W}/\text{WO}_2$  samples treated by increased overpotentials, with the soaked sample as a reference.

| State (mV) | soaked | 0   | 10   | 20   | 30   |
|------------|--------|-----|------|------|------|
| $C_B$      | 3.6    | 9.9 | 12.3 | 14.5 | 18.2 |

**Supplementary Table 5.** The bond lengths between oxygen and hydrogen atom within H<sub>2</sub>O molecule before and after dissociation on W, WO<sub>2</sub>, W/WO<sub>2</sub> catalyst surface.

| State  | Bond length between O and dissociated H (Å) |                 |                   |
|--------|---------------------------------------------|-----------------|-------------------|
|        | W                                           | WO <sub>2</sub> | W/WO <sub>2</sub> |
| Before | 0.98                                        | 1.02            | 1.02              |
| After  | 2.98                                        | 2.84            | 2.75              |

## Supplementary Discussion

### **Supplementary Discussion 1: the identification of carbon species in the as-prepared W/WO<sub>2</sub> materials (Supplementary Fig. 3).**

X-ray photoelectron spectroscopy (XPS) is very sensitive to identify the surface carbon species in carbon supported active materials (Ref: *ACS Nano* **9**, 5125-5134 (2015)). In addition to the predominant graphite carbon peak at high binding energy of 284.8 eV, commercial WC and W<sub>2</sub>C powders show a sharp carbide C 1s signal at a lower binding energy (~282.7 eV) (Supplementary Fig. 3a), but it is absolutely absent in W/WO<sub>2</sub> and pure carbon materials, suggesting the absence of tungsten carbide species in the as-prepared W/WO<sub>2</sub> materials. Raman spectra was used to evaluate the quality of graphite carbon in accordance with the D/G ratio of W/WO<sub>2</sub> materials. The D/G ratio is determined to be 0.87, which is even lower than that of the as-prepared bare carbon materials (D/G=0.9) (Supplementary Fig. 3b), indicating the as-prepared W/WO<sub>2</sub> materials are supported by relatively high-quality graphite-carbon substrates” have been added in the revised manuscript.

**Supplementary Discussion 2: the attribution of a new NEXAFS peak at approximately 540 eV on the used W/WO<sub>2</sub> solid-acid catalyst (Supplementary Fig. 13).**

In addition to the change of peak at low photo energy (~532.3 eV), we also observe that the used W/WO<sub>2</sub> sample exhibits a markedly enhanced band at approximately 538.8 eV, such a distinct peak can be attributed to the electronic interactions between O 2*p* and metal *sp* orbitals in traditional 3*d* metal (Mn, Fe, Co, Ni) oxides (Ref: *Angew. Chem. Int. Ed.* **58**, 11720-11725 (2019)), whereas the hybridization (O 2*p*-W 5*d* (*e<sub>g</sub>*)) between O 2*p* and W 5*d* (*e<sub>g</sub>*) orbitals should be responsible for the appeared signal at approximately 538.8 eV in non-3*d* metal oxides (Ref: *Ionics* **4**, 101-105 (1998)). Moreover, the sharply increased intensity of O 2*p*-W 5*d* (*e<sub>g</sub>*) hybridization directly suggests partially covalent interaction between oxygen and hydrogen atoms, confirming the insertion of produced hydrogen atoms into tungsten-oxide lattices after alkaline HER process.

**Supplementary Discussion 3: by comparing Figure 4b and Figure S16, it can be observed that both pure-phase W and WO<sub>2</sub> do not have the signals of ads. H<sub>2</sub>O.**

Compared to the distinct ads. H<sub>2</sub>O signal of W/WO<sub>2</sub> sample, no relevant signals can be observed on W and WO<sub>2</sub> sample, which can be understood by two reasons: (i) the high-density interfaces of W/WO<sub>2</sub> with rich unsaturated sites are expected to serve as the ideal adsorbed sites for H<sub>2</sub>O molecules (Ref: *Nat. Commun.* **9**, 1809 (2018)), which implies that W/WO<sub>2</sub> heterostructure catalyst can provide more available active sites for water adsorption in comparison with W and WO<sub>2</sub> counterparts; (ii) it should be noted that the detection sensitivity of NAP-XPS is almost one order of magnitude lower than that of traditional ultrahigh vacuum XPS (UHV-XPS), the relatively lower detection ability may cause the negligence of weak ads. H<sub>2</sub>O signal of W and WO<sub>2</sub> materials, meanwhile, the water atmosphere may further inhibits the collection of photoelectron signals from W and WO<sub>2</sub> catalyst surface during in situ NAP-XPS measurements.

**Supplementary Discussion 4: the small energy barrier of water dissociation on W/WO<sub>2</sub> interface cannot be originated from the shorter bond length between oxygen and dissociated hydrogen atom within H<sub>2</sub>O molecule.**

The bond lengths between oxygen and dissociated hydrogen atom (O··H) on W, WO<sub>2</sub>, and W/WO<sub>2</sub> catalyst surface are 2.98, 2.84, and 2.75 Å, respectively (Supplementary Table 5). Generally, the differences in O··H bond lengths on above three-types tungsten-based catalyst surfaces are very small, and the O··H bond length of W/WO<sub>2</sub> interface appears much shorter than the other two cases mainly due to the drawing perspective. Therefore, the major contribution of low activation barrier of H<sub>2</sub>O molecules is the regulated chemical and electronic structures rather than the shorter dissociated length of O··H on W/WO<sub>2</sub> interface.
